1 **Performance of ChatGPT on Chinese National Medical Licensing Examinations:**  
2 **A Five-Year Examination Evaluation Study for Physicians, Pharmacists and**  
3 **Nurses**

4 Hui Zong<sup>1, †</sup>, Jiakun Li<sup>1, †</sup>, Erman Wu<sup>1</sup>, Rongrong Wu<sup>1</sup>, Junyu Lu<sup>1</sup>, Bairong Shen<sup>1, \*</sup>

5 1. Department of Urology and Institutes for Systems Genetics, Frontiers Science Center  
6 for Disease-related Molecular Network, West China Hospital, Sichuan University,  
7 Chengdu, 610212, China.

8

9 † The authors contributed equally.

10 \* Corresponding Author: Bairong Shen, PhD, Professor, Institutes for Systems Genetics,  
11 Frontiers Science Center for Disease-related Molecular Network, West China Hospital,  
12 Sichuan University, No. 37, Guoxue Alley, Chengdu, Sichuan, China. Tel: 86-  
13 15995854635, Email: bairong.shen@scu.edu.cn

14

15 **Abstract**

16 **Background:** Large language models like ChatGPT have revolutionized the field of  
17 natural language processing with their capability to comprehend and generate textual  
18 content, showing great potential to play a role in medical education.

19 **Objective:** This study aimed to quantitatively evaluate and comprehensively analysis  
20 the performance of ChatGPT on three types of national medical examinations in China,  
21 including National Medical Licensing Examination (NMLE), National Pharmacist  
22 Licensing Examination (NPLE), and National Nurse Licensing Examination (NNLE).

23 **Methods:** We collected questions from Chinese NLMLE, NPLE and NNLE from year  
24 2017 to 2021. In NMLE and NPLE, each exam consists of 4 units, while in NNLE, each  
25 exam consists of 2 units. The questions with figures, tables or chemical structure were  
26 manually identified and excluded by clinician. We applied direct instruction strategy  
27 via multiple prompts to force ChatGPT to generate the clear answer with the capability  
28 to distinguish between single-choice and multiple-choice questions.

29 **Results:** ChatGPT failed to pass the threshold score (0.6) in any of the three types of

30 **NOTE:** This preprint reports new research that has not been certified by peer review and should not be used to guide clinical practice.  
examinations over the five years. Specifically, in the NMLE, the highest recorded score

31 was 0.5467, which was attained in both 2018 and 2021. In the NPLE, the highest score  
32 was 0.5599 in 2017. In the NNLE, the most impressive result was shown in 2017, with  
33 a score of 0.5897, which is also the highest score in our entire evaluation. ChatGPT's  
34 performance showed no significant difference in different units, but significant  
35 difference in different question types. ChatGPT performed well in a range of subject  
36 areas, including clinical epidemiology, human parasitology, and dermatology, as well  
37 as in various medical topics such as molecules, health management and prevention,  
38 diagnosis and screening.

39 **Conclusions:** These results indicate ChatGPT failed the NMLE, NPLE and NNLE in  
40 China, spanning from year 2017 to 2021. but show great potential of large language  
41 models in medical education. In the future high-quality medical data will be required  
42 to improve the performance.

43

44 **Keywords:** Medical Education, Medical Examination, Artificial Intelligence, Natural  
45 Language Processing, ChatGPT

46

## 47 **Introduction**

48 In the last decade, artificial intelligence (AI) technology has undergone a rapid  
49 evolution, achieving noteworthy breakthroughs in numerous fields [1, 2]. Recently, one  
50 such breakthrough that has garnered considerable attention is ChatGPT [3], an AI  
51 chatbot powered by generative pre-trained transformer (GPT) architecture, specifically  
52 GPT-3.5 with 175 billion parameters. This innovative technology is developed through  
53 human feedback reinforcement learning and trained on extensive textual data.  
54 Remarkably, ChatGPT exhibits remarkable capabilities in various tasks, including but  
55 not limited to intelligent dialogue [4], knowledge question answering[5], and text  
56 generation[6], thus showcasing unprecedented potential for further development.

57 In medical domain, there has been growing interest in exploration of large language  
58 models for tasks such as biomedical question answering (BioGPT [7]), and automatic  
59 dialogue generation (DialoGPT [8, 9]). Regrettably, these studies have so far  
60 demonstrated limited practical utility in clinical practice. However, ChatGPT, with its

61 powerful language understanding and generation capabilities, showing significant  
62 potential in the fields of clinical response generation [5, 6], clinical decision support [4,  
63 10, 11], medical education [12, 13], literature information retrieve [14], scientific  
64 writing [15-18], and beyond. Recent studies have demonstrated that ChatGPT can pass  
65 the United States Medical Licensing Exam (USMLE) [19, 20] , Radiology Board-style  
66 Examination [21], UK Neurology Specialty Certificate Examination [22], and Plastic  
67 Surgery In-Service Exam [23], with results that are comparable to those of human  
68 experts. Nevertheless, Other studies have also indicated that ChatGPT failed to pass the  
69 Family Medicine Board Exam [24], and Pharmacist Qualification Examination [25].  
70 Possible explanations for this performance difference include language and cultural  
71 differences, variations in examination content [26]. These studies highlighted the  
72 ChatGPT's ability to comprehend the complex language used in medical contexts and  
73 its potential for use in medical education. However, current researches are limited in  
74 two aspects. Firstly, it largely focuses on the English language, and secondly, it  
75 predominantly emphasizes the physician's examination. Additional investigation is  
76 necessary to explore the potential of ChatGPT in other non-English languages and  
77 various medical examinations, which can deliver substantial benefits for its expanded  
78 application in the medical domain.

79 China, with a population of over 1.4 billion, faces a significant medical burden.  
80 The provision of healthcare services involves a collaborative effort among physicians,  
81 pharmacists, and nurses who work diligently to offer the best possible care to patients.  
82 Physicians are responsible for diagnosing and treating illnesses, pharmacists ensure the  
83 appropriate medication is dispensed and administered correctly, while nurses attend to  
84 patients' daily medical management and care service. Due to limited medical resources,  
85 medical professionals in China face immense pressure, but remain committed to  
86 providing high-quality services. The advent of ChatGPT offers a promising solution to  
87 ease this burden by delivering intelligent, efficient, and precise medical services to  
88 physicians, pharmacists, and nurses.

89 Medical examinations, including the Chinese National Medical Licensing  
90 Examination (NMLE), the Chinese National Pharmacist Licensing Examination

91 (NPLE), and the Chinese National Nurse Licensing Examination (NNLE) are  
92 implemented by the government to improve professional standards, ensure medical  
93 safety and enhance healthcare services quality [27]. Through these medical  
94 examinations, the medical knowledge, clinical skills, and ethical standards mastered by  
95 medical staffs can significantly improve the quality of their services. This, in turn, can  
96 reduce the incidence of medical errors and accidents, and protect the fundamental right  
97 to health and safety of patients.

98 These medical licensing examinations aim to comprehensively evaluate candidate's  
99 knowledge of medical science, clinical examination, disease diagnosis, surgical  
100 treatment, patient prognosis, policies, and regulations, among other areas. Successfully  
101 passing these examinations is a prerequisite for obtaining professional certification for  
102 physicians, pharmacists, and nurses.

103 In this study, we aimed to quantitatively evaluate the performance of ChatGPT on  
104 three types of national medical examinations in China, namely NMLE, NPLE and  
105 NNLE. To enhance the reliability of our findings, we meticulously collected a  
106 substantial corpus of real-world medical question-answer data from examinations  
107 conducted from the year 2017 to 2021. We also conducted a comparative analysis of  
108 the performance of different units. For cases where incorrect responses were generated,  
109 we solicited feedback from domain experts and performed thorough assessment and  
110 error analysis. Our study yields valuable insights for researchers and developers to  
111 improve large language models' performance in the medical domain.

112

## 113 **Methods**

### 114 **Medical examination datasets**

115 We collected questions from Chinese NMLE, NPLE and NNLE from year 2017 to  
116 2021. In NMLE, each exam consists of 4 units, each unit has 150 questions, for a total  
117 of 600 questions. In NPLE, each exam consists of 4 units, each unit has 120 questions,  
118 for a total of 480 questions. In NNLE, each exam consists of 2 units, each unit has 120  
119 questions, for a total of 240 questions. Base on the requirements of the examination, a  
120 correct response rate of 60% or higher is considered to meet the passing criteria. The

121 questions with figures, tables or chemical structure were manually identified and  
122 excluded by a clinician with five years of clinical experience.

### 123 **Model setting**

124 We employed ChatGPT, an artificial intelligence chatbot built upon the generative  
125 pre-trained transformer technology. The official API was utilized to invoke the chatbot,  
126 with gpt-3.5-turbo as model parameter and default values for other parameters. As  
127 shown in Figure 1, the input question consisted of the background description and  
128 choices. To elicit diverse responses, we applied direct instruction strategy via prompt,  
129 such as “Please return the most correct answer”, “Only one best option can be selected”,  
130 “The correct choice is” and “This is a multiple choices question, please return the  
131 correct answer”. These prompts force the model to generate the clear answer, as well as  
132 the capability to distinguish between single-choice and multiple-choice questions.

### 133 **Evaluation**

134 For each question, the response of ChatGPT was reviewed by an experienced  
135 clinicians to determine the predict answer, which was then compared with the true  
136 answer. The score was calculated based on whether the answers match or not. A score  
137 of 1 was awarded if there is agreement between the predict answer and true answer,  
138 whereas a score of 0 was given if there is disagreement. The evaluation process has  
139 been conducted on all data sets of NMLE, NPLE and NNLE over past five years.

### 140 **Data analysis**

141 Data process was performed in Python (version 3.9.13, Python Software  
142 Foundation) using Jupyter Notebook. Statistical analysis was performed using  
143 GraphPad Prism 9 Software. The significance of differences among groups was set at  
144  $p < 0.05$ .

145

## 146 **Results**

### 147 **Overall performance**

148 As shown in Figure 2, ChatGPT failed to pass the threshold score (0.6) in any of  
149 the three types of examinations over the five years. Specifically, in the Chinese NMLE,  
150 the highest recorded score was 0.5467, which was attained in both 2018 and 2021. In

151 the Chinese NPLE, the highest score was 0.5599 in 2017. In the Chinese NNLE, the  
152 most impressive result was shown in 2017, with a score of 0.5897, which is also the  
153 highest score in our entire evaluation. Conversely, the 2019 NPLE exam resulted in the  
154 lowest score, with a recorded value of 0.4356.

### 155 **Detailed performance**

156 The score of each unit in the Chinese NMLE is shown in Table 1. The performance  
157 of ChatGPT has varied across different units and years. In 2017 and 2020, ChatGPT  
158 performed best in Unit 2. In 2018 and 2019, ChatGPT performed best in Unit 1. In the  
159 2021, ChatGPT performed best in both Unit 2 and Unit 3. In 2018 and 2021, ChatGPT  
160 correctly answered 328 out of 600 questions. This is because the complexity and  
161 difficulty of question in each unit were vary from year to year. On average, ChatGPT  
162 achieved the highest score in Unit 2 (84.6), followed by Unit 1 (79.8), Unit 3 (78.2),  
163 Unit 4 (75.4).

164 **Table 1.** The score of each unit in Chinese National Medical Licensing Examination.

| Year        | 2017   | 2018   | 2019   | 2020   | 2021   | Average |
|-------------|--------|--------|--------|--------|--------|---------|
| Unit1 score | 81     | 87     | 84     | 71     | 76     | 79.8    |
| Unit2 score | 96     | 83     | 75     | 83     | 86     | 84.6    |
| Unit3 score | 79     | 79     | 72     | 75     | 86     | 78.2    |
| Unit4 score | 65     | 79     | 75     | 78     | 80     | 75.4    |
| Total score | 321    | 328    | 306    | 307    | 328    | 318     |
| Questions   | 600    | 600    | 597    | 600    | 600    | -       |
| Accuracy    | 53.50% | 54.67% | 51.26% | 51.17% | 54.67% | 53.05%  |

165

166 The score of each unit in the Chinese NPLE is shown in Table 2. In NPLE, each  
167 unit has 120 questions, and each exam has 480 questions. We identified and removed  
168 the questions included figures, tables or chemical structure. Such questions appeared  
169 the most in 2018 (30), followed by 2020 (22), 2017 (21), 2021 (17) and 2019 (14). On  
170 average, the ChatGPT performed best in Unit 4 (62), followed by Unit 2 (58), Unit 3  
171 (53) and Unit 1(52). In the year 2017, ChatGPT achieved highest score, and correctly

172 answered 257 out of 459 questions.

173 **Table 2.** The score of each unit in Chinese National Pharmacist Licensing Examination.

| Year        | 2017   | 2018   | 2019   | 2020   | 2021   | Average |
|-------------|--------|--------|--------|--------|--------|---------|
| Unit1 score | 57     | 55     | 51     | 48     | 49     | 52      |
| Unit2 score | 63     | 54     | 52     | 60     | 61     | 58      |
| Unit3 score | 60     | 56     | 49     | 53     | 47     | 53      |
| Unit4 score | 77     | 58     | 51     | 59     | 65     | 62      |
| Total score | 257    | 223    | 203    | 220    | 222    | 225     |
| Questions   | 459    | 450    | 466    | 458    | 463    | -       |
| Accuracy    | 55.99% | 49.56% | 43.56% | 48.03% | 47.95% | 49.02%  |

174

175 The Table 3 shown the detailed score of each unit of Chinese NNLE. There are  
176 totally 26 questions included figures, tables or chemical structure were removed. In  
177 2017 and 2018, ChatGPT performed better in Unit2 than Unit1. Conversely, in 2019,  
178 2020 and 2021, ChatGPT performed better in Unit1 than Unit2. On average, ChatGPT's  
179 performance of the two units had no noticeable difference.

180 **Table 3.** The score of each unit in Chinese National Nurse Licensing Examination.

| Year        | 2017   | 2018   | 2019  | 2020   | 2021   | Average |
|-------------|--------|--------|-------|--------|--------|---------|
| Unit1 score | 65     | 57     | 72    | 54     | 67     | 63      |
| Unit2 score | 73     | 74     | 57    | 53     | 63     | 64      |
| Total score | 138    | 131    | 129   | 107    | 130    | 127     |
| Questions   | 234    | 232    | 238   | 232    | 238    | -       |
| Accuracy    | 58.97% | 56.47% | 54.2% | 46.12% | 54.62% | 54.08%  |

181

182 In comparison, ChatGPT exhibited better proficiency in NNLE (54.08%), with  
183 NMLE (53.05%) and NPLE (49.02%) following behind. The result corresponds to the  
184 complexity and difficulty of the exam questions.

### 185 **Performance on different units and question types**

186 Figure 3 demonstrated the comparative analysis of ChatGPT's performance

187 differences across units and question types. The results shown there was no significant  
188 difference in across different units in NMLE (Figure 3A), NPLE (Figure 3B), and  
189 NNLE (Figure 3C). However, in the case of NPLE (Figure 3D), ChatGPT demonstrated  
190 higher performance in single-choice questions compared to multiple-choice questions,  
191 with a highly statistical difference ( $p < 0.0001$ ).

## 192 **Performance on different subjects and topics**

193 To better understand why ChatGPT failed in the Chinese medical examination, we  
194 took the 2021 NMLE exam as an example, and labeled the medical subjects and topics  
195 for each question (Figure 4). The result revealed that ChatGPT excelled in clinical  
196 epidemiology, human parasitology, and dermatology, with all questions answered  
197 correctly. However, the model faltered in subjects such as pathology, pathophysiology,  
198 public health regulations, physiology, and anatomy, with a correct rate of less than 50%.  
199 Additionally, we observed that ChatGPT performed admirably in topics related to  
200 molecule, health management and prevention, diagnosis and screening, but its  
201 performance was lackluster in topics such as clinical manifestations, indicator values,  
202 structural location, cell, and tissue. Interestingly, we found no significant difference in  
203 performance on case-based questions and non-case-based questions. The result  
204 provides deep insight into the strengths and weaknesses of ChatGPT in medical  
205 examinations, and pave the way for future research to improve the model's capabilities  
206 in this domain.

207

## 208 **Discussion**

209 In this study, we evaluated the performance of ChatGPT, an artificial intelligence  
210 chatbot, in answering medical exam questions from Chinese NMLE, NPLE, and NNLE  
211 from year 2017 to 2021.

### 212 **ChatGPT failed NNLE, NMLE and NPLE in China**

213 The results of our study revealed that ChatGPT was unsuccessful in meeting the  
214 requirements of the three primary medical licensure assessments namely, NMLE,  
215 NPLE and NNLE in China, spanning from 2017 to 2021. There are several possible  
216 reasons for this.



217 Firstly, According to OpenAI, ChatGPT has been trained with the vast majority of  
218 the data is in English, with only a small amount of data in other languages, like Chinese.  
219 More richer training dataset allows the model to learn more knowledge. Recent studies  
220 shown that ChatGPT passed United States Medical Licensing Examination [19, 20].  
221 However, it failed to pass the Taiwanese Pharmacist Licensing Examination [25], and  
222 performed worse than medical students on Korean-based parasitology examination [28].  
223 These findings suggest that ChatGPT may require additional training data in non-  
224 English languages to enhance its performance in non-English medical exams.

225 Secondly, there are differences in medical policies, regulations, and management  
226 agencies across countries with different languages or cultures. In the Chinese NMLE,  
227 some questions relate to healthcare policies, while in the Chinese NPLE, the entire unit  
228 4 is officially designated as pharmaceutical management and regulations. These  
229 questions cover topics such as drug production, market circulation, pharmaceutical  
230 management, and legal regulations. The aim is to assess awareness and compliance  
231 ability in clinical practice. Generally, these questions are relatively short in length and  
232 clear in meaning. While ChatGPT has acquired a wealth of knowledge on healthcare  
233 policies from English-speaking countries due to its extensive English dataset, it may  
234 encounter difficulties in correctly understanding the healthcare policies of non-English-  
235 speaking countries, leading to erroneous responses to related questions. Additionally,  
236 healthcare policies undergo regular updates over time, making such questions more  
237 challenging.

238 Thirdly, in some questions, the task requires reading the question and selecting the  
239 most suitable answer from five given choices. However, there may be more than one  
240 choice that can answer the question, and in such cases, ChatGPT may generate multiple  
241 answers, including the correct answer. As this is a single-choice question, ChatGPT is  
242 forced to select a single choice as answer, which can limit its content comprehension  
243 ability and lead to incorrect answer.

#### 244 **The potential of large language model in medical education**

245 As a significant milestone in the development of artificial intelligence, ChatGPT  
246 driven by large language model has powerful capability in language understanding and

247 content generation. With its remarkable potential, ChatGPT could be a valuable  
248 resource in acquiring medical knowledge and learning clinical skills for students, and  
249 serve as an informative assistant in preparing teaching materials and evaluating course  
250 projects for teachers.

251 In our study, ChatGPT has achieved an accuracy rate of over 50% in most of the  
252 exams, indicating a significant potential for ChatGPT in medical education. Previous  
253 study shown in the Chinese Rural General Medical Licensing Examination, only 55%  
254 of students were able to pass the written examination [29]. In China, the significant  
255 healthcare burden necessitates a vast number of licensed clinical staff and healthcare  
256 providers. However, the rigorous examinations lead to low pass rates, exacerbating the  
257 shortage of licensed practitioners, especially in rural areas. The large language model  
258 presents a promising avenue for enhancing medical education and advancing healthcare  
259 reform, with the potential to reduce medical burden.

260 Finally, the advancement of artificial intelligence (AI), specifically large language  
261 models, in medical education needs public benchmarking datasets and fair evaluation  
262 metrics for performance assessment. There is also a need to interact with human experts  
263 from multiple dimensions and obtain continuous feedback. In addition, the use of such  
264 model must also consider data privacy, cognitive bias, and comply with regulations.

## 265 **Limitations**

266 Our study has some limitations. First, the questions of China NMLE, NPLE, and  
267 NNLE are all multiple-choice format. While this format meets our study purposes, it  
268 did not fully showcase the content generation capabilities of ChatGPT. In the future, it  
269 would be beneficial to include more open-ended questions. Second, we evaluated the  
270 performance of ChatGPT in medical examinations with zero-shot learning. However,  
271 better performance may be achieved by incorporating knowledge-enhanced training  
272 methods. Third, the different variations of prompt may impact ChatGPT's response,  
273 leading to diverse answers. Therefore, it is imperative to develop innovative techniques  
274 that can generate more consistent and trustworthy responses in the future. Finally,  
275 further investigation is needed to determine the underlying factors contributing to this  
276 substandard performance, and to explore broader application of ChatGPT in medical

277 education and clinical decision-making support.

278

## 279 **Conclusion**

280 In conclusion, we evaluated the performance of ChatGPT on three types of national  
281 medical examinations in China, including NMLE, NPLE, and NNLE from year 2017  
282 to 2021. The results indicated ChatGPT failed to meet the official pass criteria of 60%  
283 correct response rate in any of the three types of examinations over the five years. The  
284 performance of ChatGPT varied across different units and years, with the highest score  
285 achieved in NNLE of year 2017. ChatGPT exhibited relatively better proficiency in  
286 NNLE, with NMLE and NPLE following closely behind. ChatGPT performed well in  
287 a range of subject areas, including clinical epidemiology, human parasitology, and  
288 dermatology, as well as in various medical topics such as molecules, health  
289 management and prevention, diagnosis and screening.

290

## 291 **Funding**

292 This work was supported by the National Natural Science Foundation of China  
293 (32270690 and 32070671).

294

## 295 **Data Availability**

296 The data analyzed and reported in this study are available from the authors upon  
297 reasonable request.

298

## 299 **Authors' Contributions**

300 HZ, JL, EW, RW, JL and BS involved in the study conceptualization. JL collected and  
301 preprocessed the data. HZ conducted data analysis, results interpretation and  
302 manuscript preparation. HZ, JL EW, RW, JL and BS contributed to the review and  
303 editing of the manuscript. BS supervised the study. All authors read and approved the  
304 final manuscript.

305

## 306 **Acknowledgments**

307 We thank OpenAI, which allows free access to ChatGPT.

308

### 309 **Conflict of Interest**

310 The authors declare no conflict of competing interests.

311

### 312 **References**

313

- 314 1. Bhinder, B., et al., *Artificial Intelligence in Cancer Research and Precision Medicine*. Cancer  
315 Discov, 2021. **11**(4): p. 900-915.
- 316 2. Moor, M., et al., *Foundation models for generalist medical artificial intelligence*. Nature,  
317 2023. **616**(7956): p. 259-265.
- 318 3. van Dis, E.A.M., et al., *ChatGPT: five priorities for research*. Nature, 2023. **614**(7947): p.  
319 224-226.
- 320 4. Sarink, M.J., et al., *A study on the performance of ChatGPT in infectious diseases clinical*  
321 *consultation*. Clin Microbiol Infect, 2023.
- 322 5. Lee, T.C., et al., *ChatGPT Answers Common Patient Questions About Colonoscopy*.  
323 Gastroenterology, 2023.
- 324 6. Young, J.N., et al., *The utility of ChatGPT in generating patient-facing and clinical*  
325 *responses for melanoma*. J Am Acad Dermatol, 2023.
- 326 7. Luo, R., et al., *BioGPT: generative pre-trained transformer for biomedical text generation*  
327 *and mining*. Brief Bioinform, 2022. **23**(6).
- 328 8. Zhang, Y., et al. *DIALOGPT : Large-Scale Generative Pre-training for Conversational*  
329 *Response Generation*. 2020. Online: Association for Computational Linguistics.
- 330 9. Das, A., et al. *Conversational Bots for Psychotherapy: A Study of Generative Transformer*  
331 *Models Using Domain-specific Dialogues*. 2022. Dublin, Ireland: Association for  
332 Computational Linguistics.
- 333 10. Komorowski, M., M. Del Pilar Arias Lopez, and A.C. Chang, *How could ChatGPT impact*  
334 *my practice as an intensivist? An overview of potential applications, risks and limitations*.  
335 Intensive Care Med, 2023.
- 336 11. Munoz-Zuluaga, C., et al., *Assessing the Accuracy and Clinical Utility of ChatGPT in*  
337 *Laboratory Medicine*. Clin Chem, 2023.
- 338 12. Yang, H., *How I use ChatGPT responsibly in my teaching*. Nature, 2023.
- 339 13. Abd-Alrazaq, A., et al., *Large Language Models in Medical Education: Opportunities,*  
340 *Challenges, and Future Directions*. JMIR Med Educ, 2023. **9**: p. e48291.
- 341 14. Jin, Q., R. Leaman, and Z. Lu, *Retrieve, Summarize, and Verify: How Will ChatGPT Affect*  
342 *Information Seeking from the Medical Literature?* J Am Soc Nephrol, 2023.
- 343 15. Kooroor, J.G., A.K. Gupta, and S. Bacchi, *ChatGPT: effective writing is succinct*. BMJ, 2023.  
344 **381**: p. 1125.
- 345 16. Shafiee, A., *Matters arising: authors of research papers must cautiously use ChatGPT for*  
346 *scientific writing*. Int J Surg, 2023.
- 347 17. Gao, C.A., et al., *Comparing scientific abstracts generated by ChatGPT to real abstracts*

- 348 *with detectors and blinded human reviewers.* NPJ Digit Med, 2023. **6**(1): p. 75.
- 349 18. Salvagno, M., F.S. Taccone, and A.G. Gerli, *Can artificial intelligence help for scientific*  
350 *writing?* Crit Care, 2023. **27**(1): p. 75.
- 351 19. Kung, T.H., et al., *Performance of ChatGPT on USMLE: Potential for AI-assisted medical*  
352 *education using large language models.* PLOS Digit Health, 2023. **2**(2): p. e0000198.
- 353 20. Gilson, A., et al., *How Does ChatGPT Perform on the United States Medical Licensing*  
354 *Examination? The Implications of Large Language Models for Medical Education and*  
355 *Knowledge Assessment.* JMIR Med Educ, 2023. **9**: p. e45312.
- 356 21. Bhayana, R., S. Krishna, and R.R. Bleakney, *Performance of ChatGPT on a Radiology Board-*  
357 *style Examination: Insights into Current Strengths and Limitations.* Radiology, 2023. **307**(5):  
358 p. e230582.
- 359 22. Giannos, P., *Evaluating the limits of AI in medical specialisation: ChatGPT's performance*  
360 *on the UK Neurology Specialty Certificate Examination.* BMJ Neurol Open, 2023. **5**(1): p.  
361 e000451.
- 362 23. Humar, P., et al., *ChatGPT is Equivalent to First Year Plastic Surgery Residents: Evaluation*  
363 *of ChatGPT on the Plastic Surgery In-Service Exam.* Aesthet Surg J, 2023.
- 364 24. Weng, T.L., et al., *ChatGPT failed Taiwan's Family Medicine Board Exam.* J Chin Med Assoc,  
365 2023.
- 366 25. Wang, Y.M., H.W. Shen, and T.J. Chen, *Performance of ChatGPT on the Pharmacist*  
367 *Licensing Examination in Taiwan.* J Chin Med Assoc, 2023.
- 368 26. Seghier, M.L., *ChatGPT: not all languages are equal.* Nature, 2023. **615**(7951): p. 216.
- 369 27. Wang, X., *Experiences, challenges, and prospects of National Medical Licensing*  
370 *Examination in China.* BMC Med Educ, 2022. **22**(1): p. 349.
- 371 28. Huh, S., *Are ChatGPT's knowledge and interpretation ability comparable to those of*  
372 *medical students in Korea for taking a parasitology examination?: a descriptive study.* J  
373 Educ Eval Health Prof, 2023. **20**: p. 1.
- 374 29. Han, X., et al., *Performance of China's new medical licensing examination for rural general*  
375 *practice.* BMC Med Educ, 2020. **20**(1): p. 314.

376

377

378 **Figure Legends**

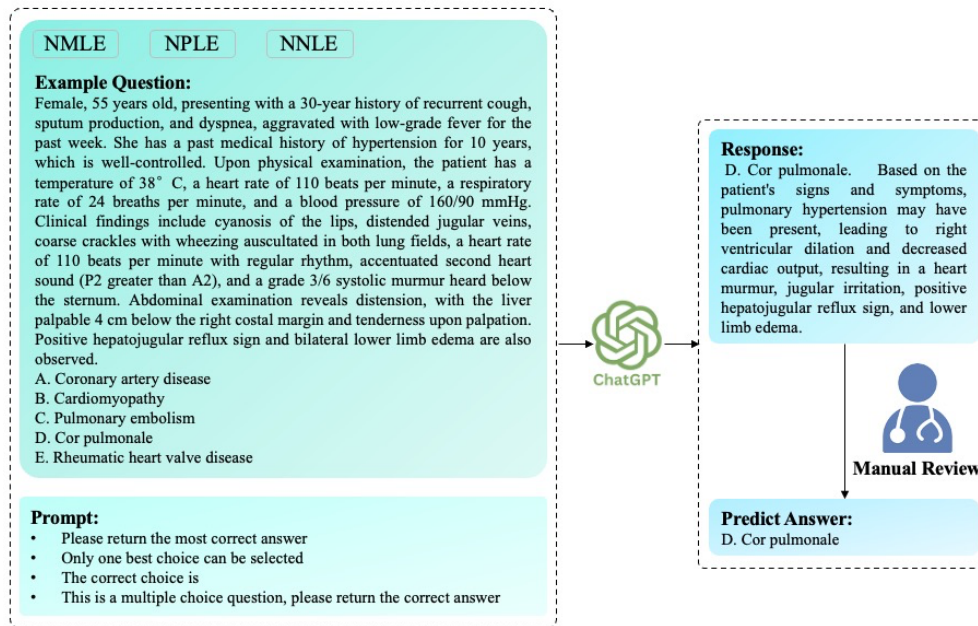

379

380

381 **Figure 1.** The overview of interaction with ChatGPT. The question included  
382 background description and choices from three national licensing examinations,  
383 including Chinese National Medical Licensing Examination (NMLE), National  
384 Pharmacist Licensing Examination (NPLE) and National Nurse Licensing Examination  
385 (NNLE). The prompt was designed to force a clear answer, as well as the ability to  
386 recognize single-choice or multiple-choice questions. The response of ChatGPT were  
387 manually reviewed by an experienced clinician to determine the answer. The correct  
388 answer to this question is “D. Cor pulmonale”. It should be noted that while English  
389 text was shown in the figure, the experiment itself used Chinese text as both the input  
390 and output language.

391

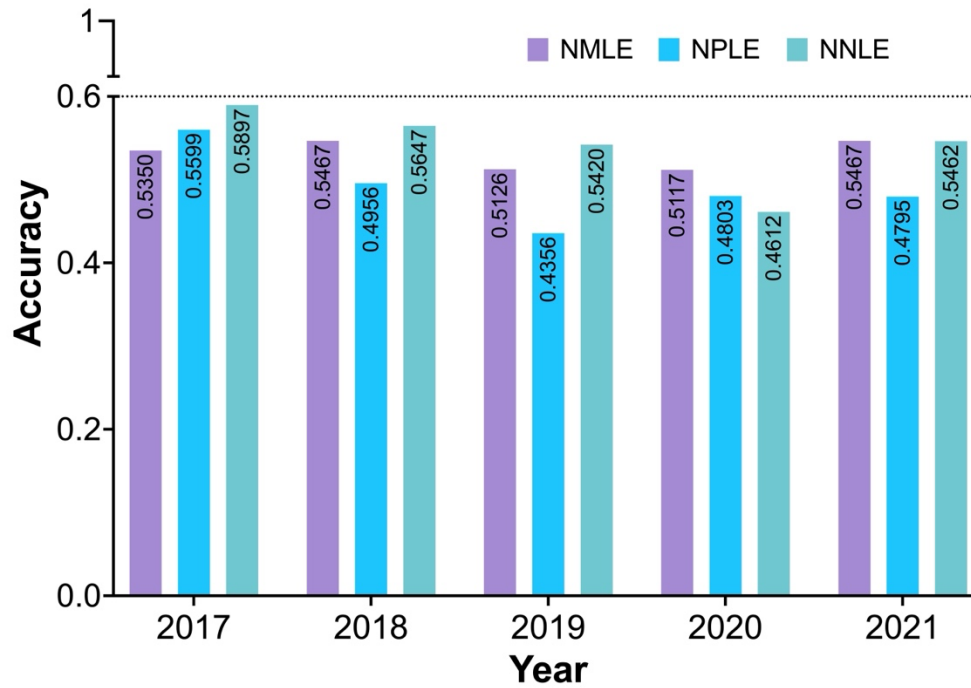

392

393 **Figure 2.** The performance of ChatGPT of three national licensing examinations over  
394 a period of five years from 2017 to 2022. The examinations included Chinese National  
395 Medical Licensing Examination (NMLE), National Pharmacist Licensing Examination  
396 (NPLE) and National Nurse Licensing Examination (NNLE).

397

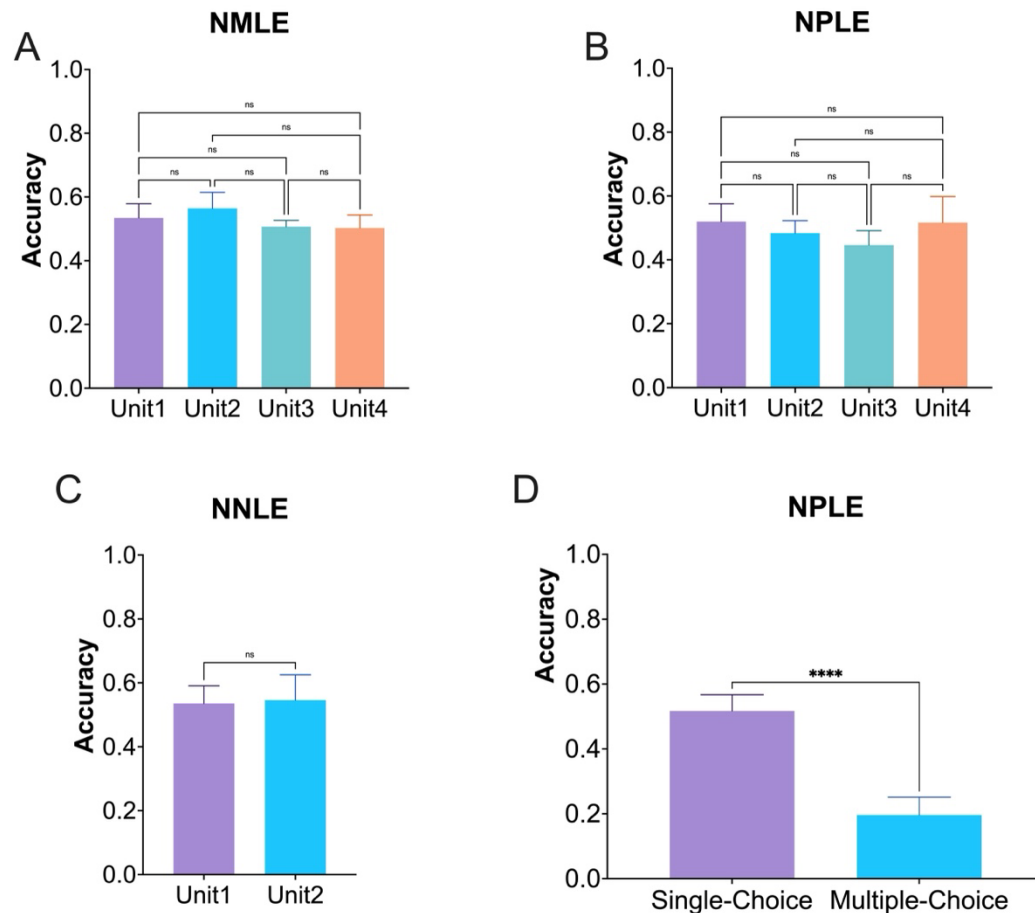

398

399 **Figure 3.** The performance of ChatGPT on different units and question types. For  
400 different units, there were no significant difference among (A) Chinese National  
401 Medical Licensing Examination (NMLE), (B) National Pharmacist Licensing  
402 Examination (NPLE), and (C) National Nurse Licensing Examination (NPLE). (D)  
403 However, ChatGPT demonstrated higher performance in single-choice questions than  
404 multiple-choice questions with a highly significant difference (ns, no significant  
405 difference, \*\*\*\*p < 0.0001).

406



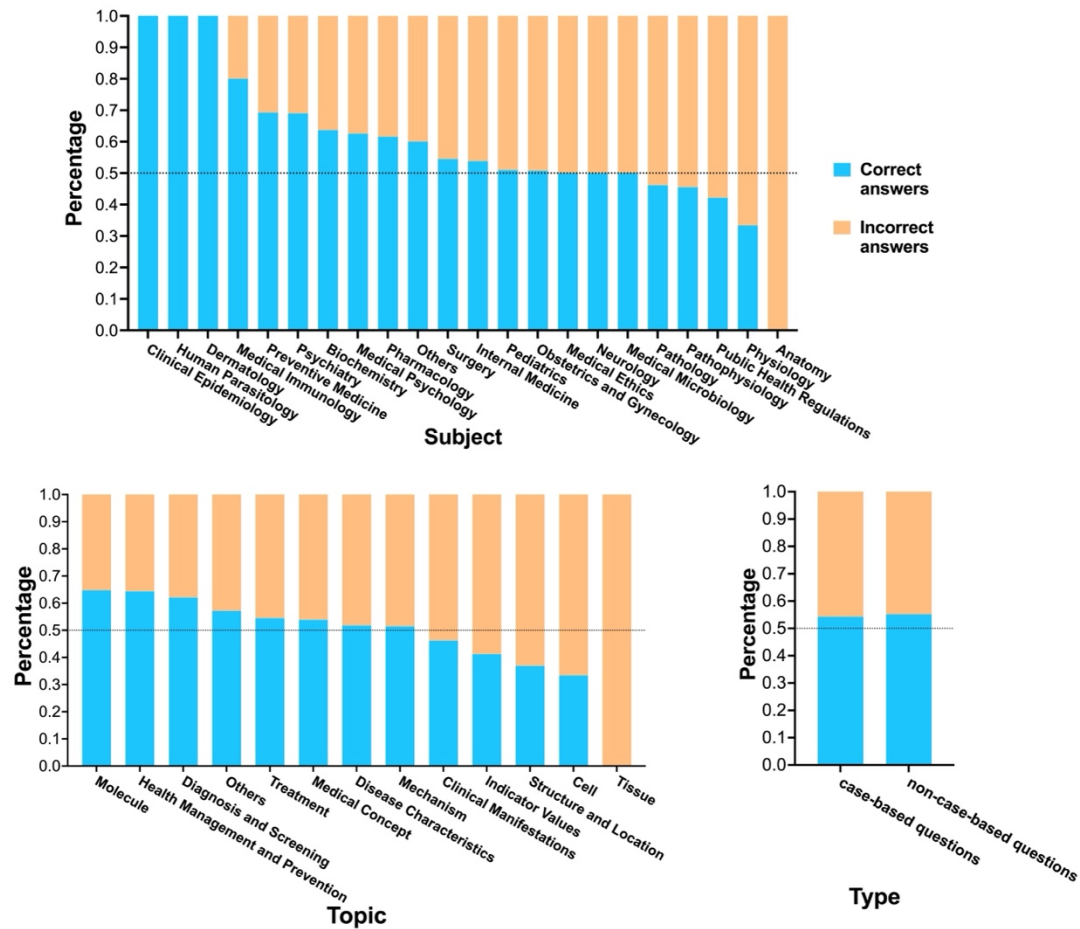

407

408 **Figure 4.** The performance of ChatGPT on different subjects, topics and types of

409 questions in the 2021 NMLE exam.

410
